# Supplementary material for: Facile synthesis, formation mechanism and thermochromic properties of W-doped VO2(M) nanoparticles for smart window applications
Source: Royal Society of Chemistry journal article supplement (doi:10.1039/d0tc03436c), 2020-01-01
Supplement: d0tc03436c1.pdf [file d0tc03436c1.pdf]

**Facile Synthesis, Formation Mechanism and Thermo-chromic  
Properties of W-doped VO<sub>2</sub>(M) Nanoparticles for Smart Window  
Applications**

*Liangmiao Zhang<sup>a</sup>, Fang Xia<sup>\*b</sup>, Jianing Yao<sup>a</sup>, Tianli, Zhu<sup>a</sup>, Hui Xia<sup>a</sup>, Guang Yang<sup>a</sup>,*

*Bin Liu<sup>a</sup> and Yanfeng Gao<sup>\*a</sup>*

<sup>a</sup>School of Materials Science and Engineering, Shanghai University, 99 Shangda Rd.,  
Shanghai 200444, China

<sup>b</sup>Chemistry and Physics, College of Science, Health, Engineering and Education,  
Murdoch University, Perth, WA 6150, Australia

**Corresponding author:** yfgao@shu.edu.cn; F.Xia@murdoch.edu.au

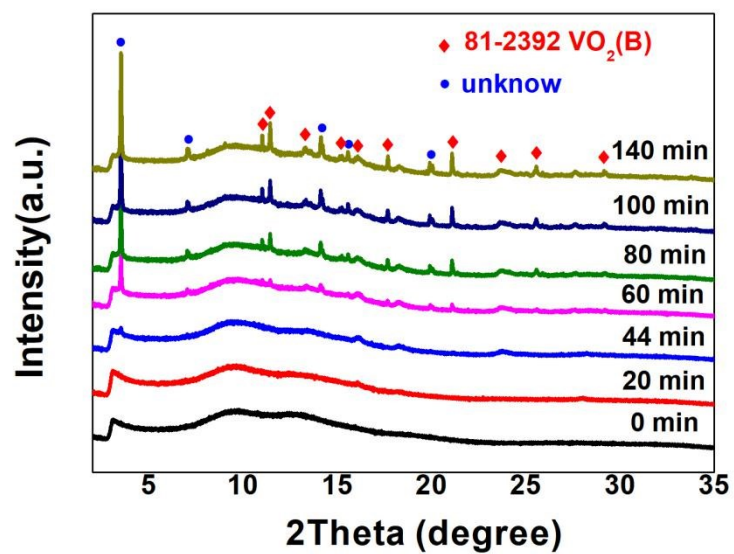

**Figure S1** Several selected *in-situ* SR-XRD patterns during the synthesis of VO<sub>2</sub>(M) NPs.
